# Supplementary material for: The sands of time: rediscovery of the genus Neozoanthus (Cnidaria: Hexacorallia) and evolutionary aspects of sand incrustation in brachycnemic zoanthids
Source: Springer Nature journal article supplement (doi:10.1007/s00227-011-1624-8), 2011-01-21
Supplement: MOESM3 [file 227_2011_1624_MOESM3_ESM.doc]

Table S1. *Neozoanthus* specimens examined in this study with cytochrome oxidase subunit I (COI) and mitochondrial 16S ribosomal DNA (mt 16S rDNA) GenBank Accession Numbers.

| **Specimen number** | **Collection location** | **Depth (m)** | **Collection date** | **Collector(s)** | **COI** | **mt 16S rDNA** |
| --- | --- | --- | --- | --- | --- | --- |
| HI135 | North West Reef, GBR, Australia | 10 | Nov. 17, 2009 | JD Reimer | NA | NA |
| HI141 | Sykes Reef, GBR, Australia | 21 | Nov. 18, 2009 | JD Reimer | HM991247 | HM991230 |
| HI142 | Sykes Reef, GBR, Australia | 21 | Nov. 18, 2009 | JD Reimer | HM991248 | HM991231 |
| HI143 | Sykes Reef, GBR, Australia | 21 | Nov. 18, 2009 | JD Reimer | NA | HM991232 |
| HI144 | Sykes Reef, GBR, Australia | 20 | Nov. 18, 2009 | JD Reimer | NA | HM991233 |
| HI145 | Sykes Reef, GBR, Australia | 18 | Nov. 18, 2009 | JD Reimer | HM991249 | HM991234 |
| HI199 | Heron Channel, GBR, Australia | 22 | Nov. 22, 2009 | JD Reimer | NA | NA |
| HI200 | Heron Channel, GBR, Australia | 23 | Nov. 22, 2009 | JD Reimer | HM991250 | HM991235 |
| HI209 | Sykes Reef, GBR, Australia | 28 | Nov. 23, 2009 | JD Reimer | HM991251 | HM991236 |
| HI214 | Sykes Reef, GBR, Australia | 9 | Nov. 23, 2009 | JD Reimer | HM991252 | HM991237 |
| HI218 | Sykes Reef, GBR, Australia | 4 | Nov. 23, 2009 | JD Reimer | HM991253 | HM991238 |
| HI224 | Heron Channel, GBR, Australia | 26 | Nov. 24, 2009 | JD Reimer | HM991254 | HM991239 |
| HI225 | Heron Channel, GBR, Australia | 25 | Nov. 24, 2009 | JD Reimer | HM991255 | HM991240 |
| HI227 | Heron Channel, GBR, Australia | 25 | Nov. 24, 2009 | JD Reimer | HM991256 | HM991241 |
| HI231 | Heron Channel, GBR, Australia | 23 | Nov. 24, 2009 | JD Reimer | HM991257 | HM991242 |
| MISE 539 | Manza, Okinawa, Japan | 25 | Sept. 1, 2008 | JD Reimer et al. | NA | NA |
| MISE 545 | Teniya, Okinawa, Japan | 1 to 2 | Sept. 5, 2008 | JD Reimer et al. | NA | NA |
| MISE 546 | Teniya, Okinawa, Japan | 1 to 2 | Sept. 5, 2008 | JD Reimer et al. | NA | NA |
| MISE 548 | Teniya, Okinawa, Japan | 1 to 2 | Sept. 5, 2008 | JD Reimer et al. | HM991246 | HM991227 |
| MISE 549 | Teniya, Okinawa, Japan | 1 to 2 | Sept. 5, 2008 | JD Reimer et al. | NA | NA |
| MISE 550 | Teniya, Okinawa, Japan | 1 to 2 | Sept. 5, 2008 | JD Reimer et al. | HM991243 | NA |
| MISE 560 | Yona, Okinawa, Japan | 13 | Sept. 24, 2008 | JD Reimer, T Fujii | NA | NA |
| MISE 1092 | Teniya, Okinawa, Japan | 1 | July 2008 | JD Reimer | NA | NA |
| MISE 1093 | Teniya, Okinawa, Japan | intertidal | July 2008 | JD Reimer | NA | NA |
| MISE 1115 | Tinyuhama, Korijima, Okinawa, Japan | 24 | Dec. 28, 2008 | JD Reimer | HM991245 | HM991228 |
| MISE 1116 | Tinyuhama, Korijima, Okinawa, Japan | 24 | Dec. 28, 2008 | JD Reimer | HM991244 | HM991229 |
| MISE 1400 | Omonawa, Tokunoshima, Kagoshima, Japan | 9 | March 9, 2010 | JD Reimer | NA | NA |
| MISE 1401 | San, Tokunoshima, Kagoshima, Japan | 10 | March 10, 2010 | JD Reimer | NA | NA |
| MISE 1402 | San, Tokunoshima, Kagoshima, Japan | 12 | March 10, 2010 | JD Reimer | NA | NA |
| MISE 1403 | Zampa, Okinawa, Japan | NA | August 29, 2008 | JD Reimer | NA | NA |
| FS651 | Teniya, Okinawa, Japan | intertidal | May 20, 2008 | F Sinniger | NA | NA |
| FS652 | Teniya, Okinawa, Japan | intertidal | May 20, 2008 | F Sinniger | NA | NA |

Abbreviations: GBR=Great Barrier Reef; NA=not acquired.
